# Supplementary material
Source: MDPI journal article supplement (https://www.mdpi.com/2306-5338/8/1/43)
Supplement: s1 [file s1]

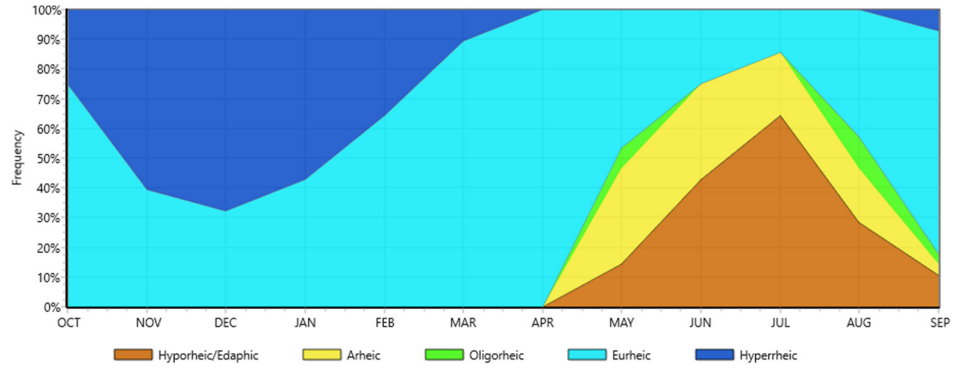

(a)

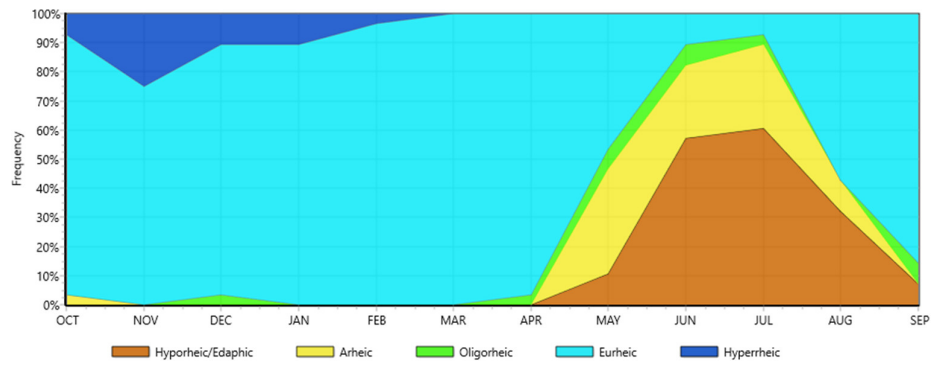

(b)

**Figure S1.** Aquatic State Frequency Graph, (a): natural state (1955-1984), (b): present (1990-2019).

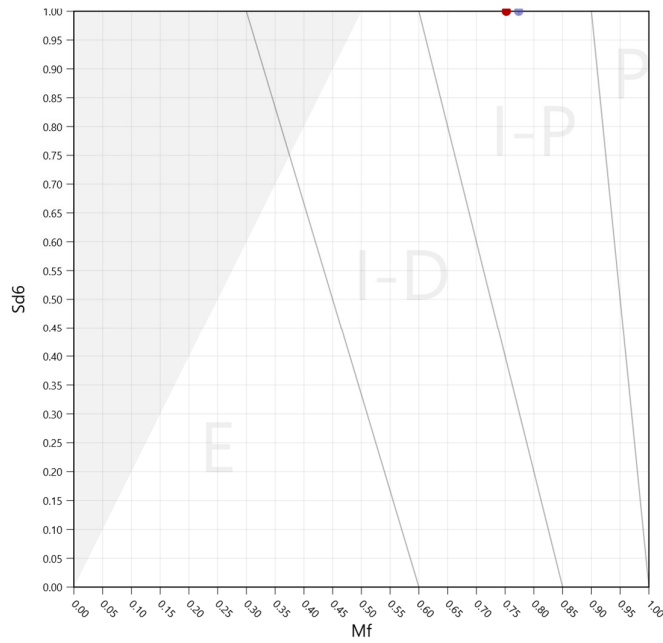

**Figure S2.** Temporary Regime Plot (TRP) of Tsiknias river in natural (red) and actual conditions (blue).

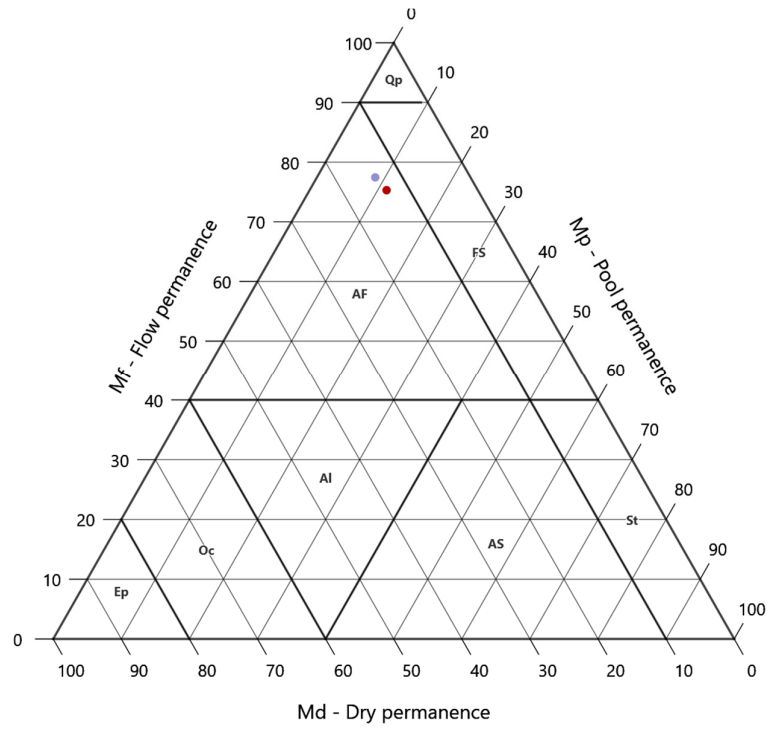

**Figure S3.** Flow-Pools-Dry (FDP) plot of Tsiknias river in natural(red) and actual conditions(blue).
